# Supplementary material
Source: PubMed Central journal article supplement (PMC3982695)
Supplement: 0e5bf483f3d03d84e0741fcc1f46211b_genetics.114.162396-7.pdf [file 0e5bf483f3d03d84e0741fcc1f46211b_genetics.114.162396-7.pdf]

**Table S5 Expected (top half) and observed (bottom half) frequencies of blocks with a total numbers of mutations  $S$  for each of the four topology classes.** The expectation is derived assuming the model that provided the best fit to the 2kb (N/YRI/CEU) data (Table 2) and closely fits the observed frequencies.

| $S$           | 0    | 1      | 2     | 3      | 4      | 5      | 6       | 7       | 8        | Total |
|---------------|------|--------|-------|--------|--------|--------|---------|---------|----------|-------|
| (N,(YRI,CEU)) | n/a  | 0.046  | 0.043 | 0.024  | 0.0099 | 0.0036 | 0.0012  | 0.00039 | 0.00012  | 0.13  |
| (YRI,(N,CEU)) | n/a  | 0.012  | 0.013 | 0.0083 | 0.0040 | 0.0016 | 0.00058 | 0.00019 | 0.000062 | 0.039 |
| (CEU,(N,YRI)) | n/a  | 0.0085 | 0.011 | 0.0071 | 0.0035 | 0.0014 | 0.00053 | 0.00018 | 0.000058 | 0.032 |
| Unresolved    | 0.36 | 0.28   | 0.12  | 0.037  | 0.0099 | 0.0023 | 0.00050 | 0.00010 | 0.000020 | 0.80  |
| (N,(YRI,CEU)) | n/a  | 0.052  | 0.046 | 0.023  | 0.0097 | 0.0037 | 0.0013  | 0.00039 | 0.00014  | 0.14  |
| (YRI,(N,CEU)) | n/a  | 0.015  | 0.015 | 0.0084 | 0.0038 | 0.0016 | 0.00059 | 0.00018 | 0.000052 | 0.045 |
| (CEU,(N,YRI)) | n/a  | 0.013  | 0.013 | 0.0078 | 0.0036 | 0.0013 | 0.00054 | 0.00020 | 0.000045 | 0.040 |
| Unresolved    | 0.36 | 0.26   | 0.11  | 0.036  | 0.011  | 0.0027 | 0.00078 | 0.00024 | 0.000063 | 0.78  |

Note that 80% of blocks are topologically unresolved.
