# Supplementary material
Source: PubMed Central journal article supplement (PMC3982695)
Supplement: 3c78867c88888f84ceb2208217c2db71_genetics.114.162396-8.pdf [file 3c78867c88888f84ceb2208217c2db71_genetics.114.162396-8.pdf]

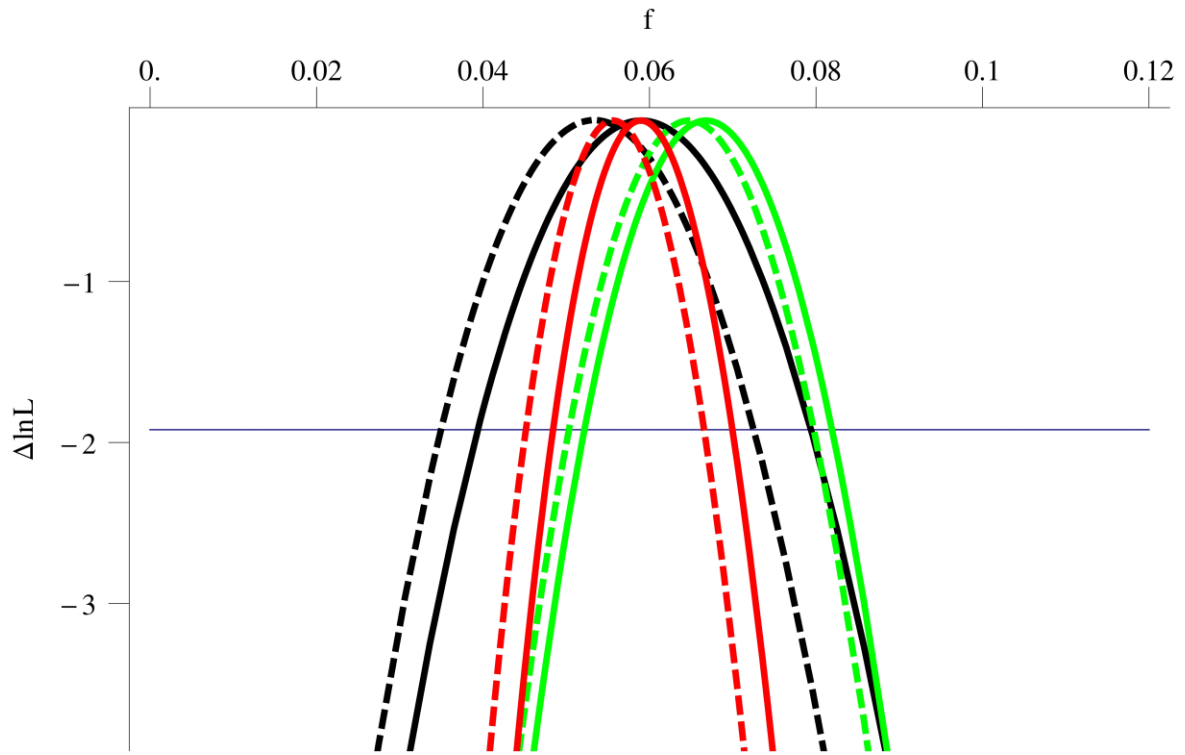

**Figure S2**  $\Delta \ln L$  plotted against the admixture proportion  $f$  (from Neandertals into Eurasians) inferred from the 2 kb (black), 4kb (green) and 8kb data (red) for the CEU (dashed lines) and the CHB (solid) triplets. 95% confidence intervals are given by the horizontal line.
