# Supplementary material
Source: PubMed Central journal article supplement (PMC3982695)
Supplement: 60ee5e7c94fe9160bc9080f82a9f004c_genetics.114.162396-9.pdf [file 60ee5e7c94fe9160bc9080f82a9f004c_genetics.114.162396-9.pdf]

**Table S3 Support  $\Delta \ln L$  relative to the best fitting model (IUA) for alternative models of history.** Strict divergence (Null), divergence with admixture (IUA) or ancestral population structure (AS). The IUA<sub>2</sub> model allows for different effective sizes in the two ancestral populations. The number of model parameters is shown in brackets. Models were estimated without the Neandertal singletons

| Dataset  | IUA <sub>2</sub> (5) | IUA (4) | AS (4) | Null (3) |
|----------|----------------------|---------|--------|----------|
| CEU, 2kb | 0                    | 2.6     | 13.7   | 13.7     |
| CHB, 2kb | 0                    | 1.9     | 13.9   | 13.9     |
| CEU, 4kb | 0                    | 3.2     | 29.9   | 29.9     |
| CHB, 4kb | 0                    | 3.4     | 32.9   | 32.9     |
| CEU, 8kb | 0                    | 17.4    | 53.3   | 53.3     |
| CHB, 8kb | 0                    | 18.2    | 52.7   | 52.7     |
