# Supplementary material
Source: PubMed Central journal article supplement (PMC3982695)
Supplement: 86f6a028f64212c4041d3b8d5e932b5a_genetics.114.162396-2.pdf [file 86f6a028f64212c4041d3b8d5e932b5a_genetics.114.162396-2.pdf]

**Table S2 Maximum likelihood estimates of parameters under the IUA<sub>2</sub> model.** Time parameters are scaled in generations; the second row (in bold) gives absolute values, i.e. effective population sizes in individuals and divergence in KY. 95% confidence intervals are shown in brackets.

| Data     | $\theta$ ( $N_e$ )          | $\theta$ ( $N_e$ )          | $T_1$                 | $T_2$                 | $T_{gf}$                             | $f$                   |
|----------|-----------------------------|-----------------------------|-----------------------|-----------------------|--------------------------------------|-----------------------|
| CEU, 4kb | 0.71                        | 0.98                        | 0.411                 | 1.28                  | 0.411                                | 0.065, (0.050–0.080)  |
|          | <b>5,910, (5,840–5,990)</b> | <b>8,180, (7,790–8,600)</b> | <b>121, (115–128)</b> | <b>377, (369–385)</b> | <b>121, (79.9– <math>T_1</math>)</b> |                       |
| CHB, 4kb | 0.71                        | 0.97                        | 0.418                 | 1.26                  | 0.418                                | 0.069, (0.054–0.084)  |
|          | <b>5,970, (5,880–6,030)</b> | <b>8,080, (7,700–8,500)</b> | <b>125, (118–131)</b> | <b>376, (368–383)</b> | <b>125, (81.6– <math>T_1</math>)</b> |                       |
| CEU, 8kb | 1.17                        | 1.84                        | 0.411                 | 1.27                  | 0.411                                | 0.056, (0.045, 0.067) |
|          | <b>4,870, (4,820–4,920)</b> | <b>7,680, (7,360–8,040)</b> | <b>137, (132–142)</b> | <b>399, (393–405)</b> | <b>137, (111– <math>T_1</math>)</b>  |                       |
| CHB, 8kb | 1.17                        | 1.86                        | 0.415                 | 1.26                  | 0.415                                | 0.059, (0.048–0.070)  |
|          | <b>4,890, (4,840–4,930)</b> | <b>7,750, (7,520–8,000)</b> | <b>137, (132–145)</b> | <b>401, (395–407)</b> | <b>137, (112– <math>T_1</math>)</b>  |                       |
