# Supplementary material
Source: PubMed Central journal article supplement (PMC3982695)
Supplement: a9f689ec11334f55e51c58819dbac19e_genetics.114.162396-10.pdf [file a9f689ec11334f55e51c58819dbac19e_genetics.114.162396-10.pdf]

**Table S1 The expected information on parameters in the IUA model.** The second row gives the expected standard deviation of parameter estimates based on 10,000 blocks for the parameter values assumed by Durand et al. (2011) (bottom row in bold). Results are shown for 2kb and 4kb blocks.

| Parameter | 2kb          |             |             |             | 4kb     |        |          |       |
|-----------|--------------|-------------|-------------|-------------|---------|--------|----------|-------|
|           | $T_1$        | $T_2$       | $T_{gf}$    | $f$         | $T_1$   | $T_2$  | $T_{gf}$ | $f$   |
| $E[I]$    | 0.733        | 0.701       | 0.003       | 0.477       | 1.27    | 1.22   | 0.008    | 0.838 |
| $E[SD]$   | 0.0117       | 0.0119      | 0.178       | 0.0145      | 0.00886 | 0.0091 | 0.112    | 0.011 |
|           | <b>0.125</b> | <b>0.15</b> | <b>0.60</b> | <b>0.04</b> |         |        |          |       |
