# Supplementary material
Source: PubMed Central journal article supplement (PMC3982695)
Supplement: a53a3d32e12322452de42b095a1bd8d8_genetics.114.162396-3.pdf [file a53a3d32e12322452de42b095a1bd8d8_genetics.114.162396-3.pdf]

**Table S4 Maximum likelihood estimates of parameters under the divergence with admixture (IUA) model.**

Neandertal singletons are excluded from the analysis. Time parameters are scaled in generations and measured from the present. The second row (in bold) gives absolute parameter values, i.e. effective population sizes in individuals and divergence in KY.

| Dataset  | $\theta$ ( $N_e$ )        | $T_1$                 | $T_2$                 | $T_{gf}$ | $f$                  |
|----------|---------------------------|-----------------------|-----------------------|----------|----------------------|
| CEU, 2kb | 0.425                     | 0.367                 | 0.924                 | n/a      | 0.055, (0.036–0.073) |
|          | <b>7,100, (6950–7250)</b> | <b>136, (131–141)</b> | <b>342, (336–349)</b> | n/a      |                      |
| CHB, 2kb | 0.423                     | 0.370                 | 0.930                 | n/a      | 0.057, (0.039–0.076) |
|          | <b>7,070, (6930–7210)</b> | <b>136, (130–141)</b> | <b>341, (334–347)</b> | n/a      |                      |

95% confidence intervals (in brackets) were calculated assuming that LD between blocks >100kb apart can be ignored.
