# Supplementary material
Source: PubMed Central journal article supplement (PMC3982695)
Supplement: a585c2e823dd46e2ec23a0203ce207cb_genetics.114.162396-1.pdf [file a585c2e823dd46e2ec23a0203ce207cb_genetics.114.162396-1.pdf]

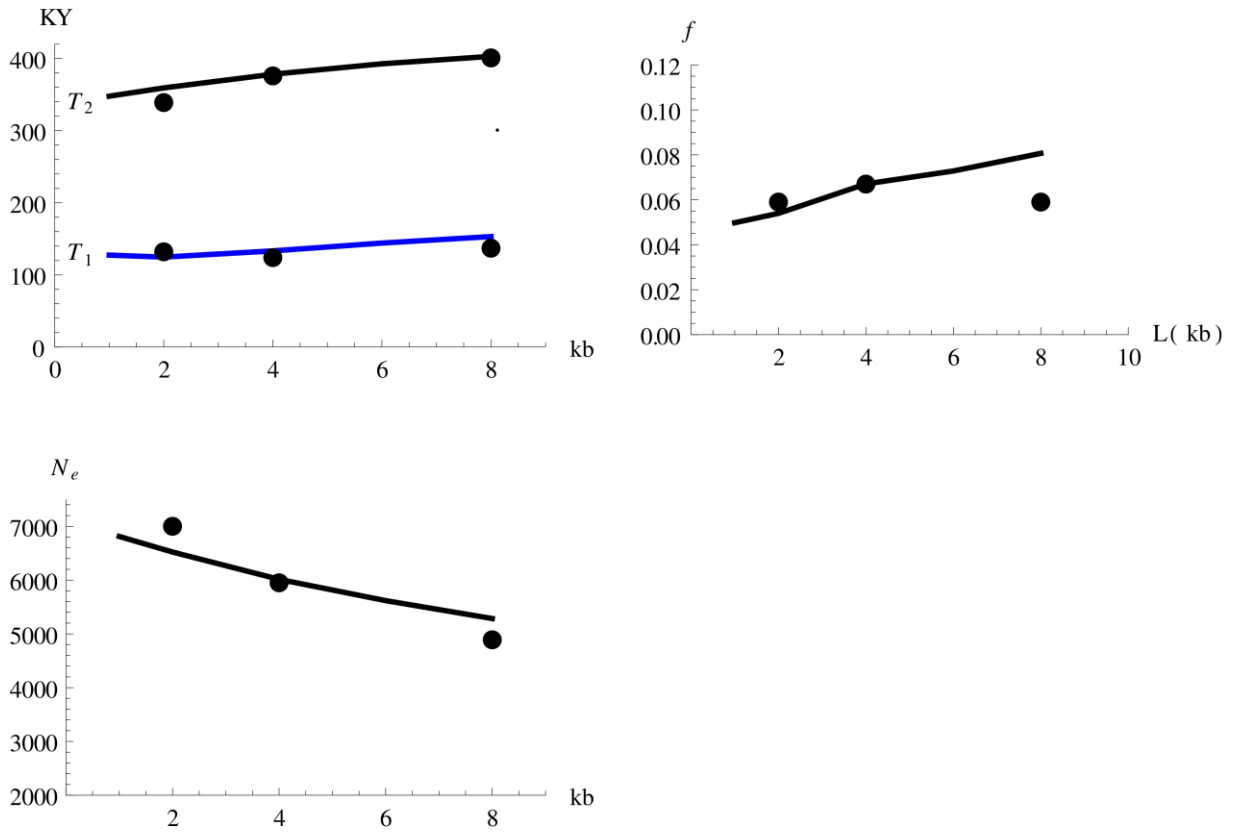

**Figure S3** Expected estimates of parameters from data simulated with recombination (1.3 cM/Mb) plotted against block length. The parameter estimates from the 2, 4 and 8kb analyses of the CEU dataset (assuming no intra-locus recombination) are shown as black dots.
