# Supplementary material
Source: PubMed Central journal article supplement (PMC3982695)
Supplement: f15345170639aedaa5cfe6d667459b7e_genetics.114.162396-4.pdf [file f15345170639aedaa5cfe6d667459b7e_genetics.114.162396-4.pdf]

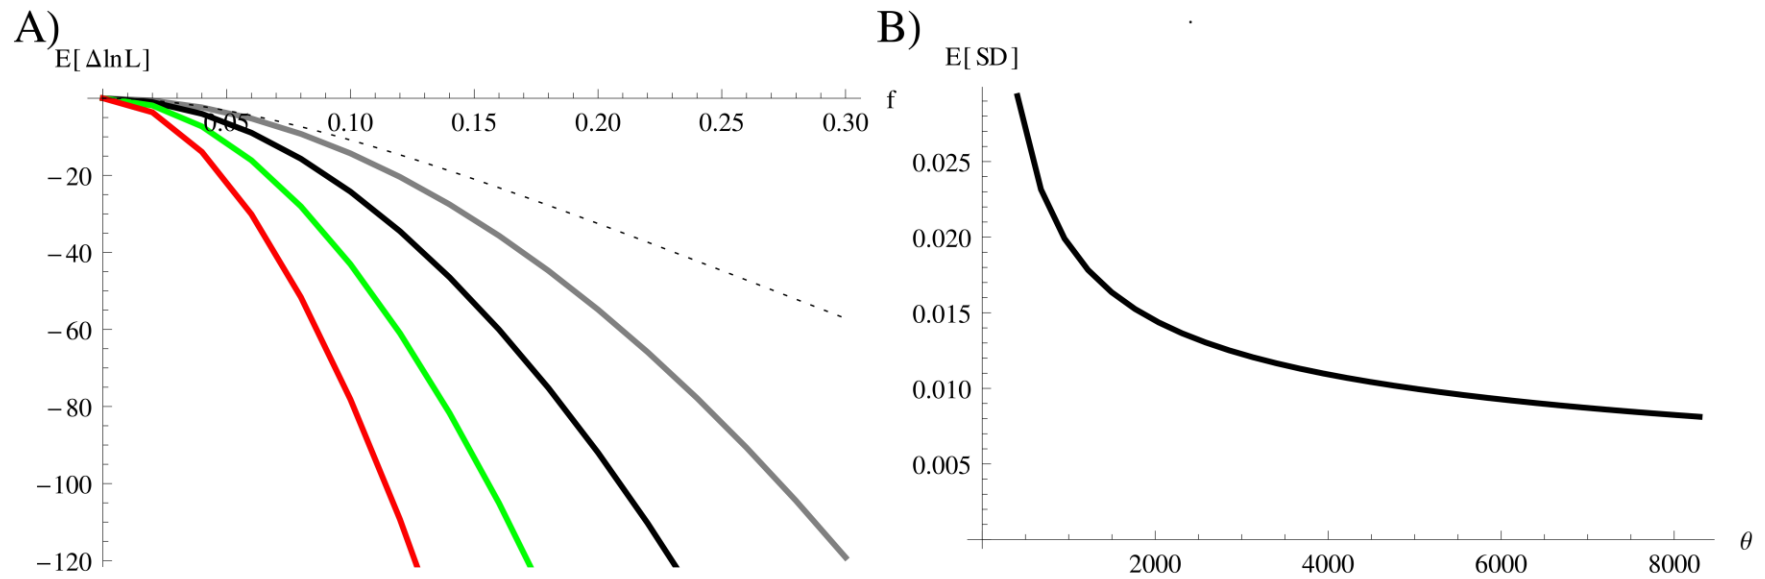

**Figure S1** (A) The expected information ( $E[\Delta \ln L]$ ) to distinguish the IUA model (Durand et al. (2011) parameters) from a null model of strict divergence. The dotted line shows the information contained in 10,000 unlinked SNPs. The grey line corresponds to 10,000 blocks each containing a single SNP on average analysed using maximum likelihood. Black, green and red show results for 2kb, 4kb and 8kb blocks respectively. (B) The expected standard deviation ( $E[SD]$ ) of  $f$  for the likelihood method plotted against block length.
